# Supplementary material for: Pharmacologic Therapies for Aortic Stiffness in End-Stage Renal Disease: A Systematic Review and Meta-Analysis
Source: PubMed Central journal article supplement — Can J Kidney Health Dis. 2020 Feb 22;7:2054358120906974. doi: 10.1177/2054358120906974 (PMC7036505; doi:10.1177/2054358120906974), 2020-02-22
Supplement: CLEAN_Rodriguez_CJKHD_SupplementaryTABLE_S-1.pdf [file CLEAN_Rodriguez_CJKHD_SupplementaryTABLE_S-1.pdf]

**Supplementary Table S-1.** Within-group effects of anti-hypertensive classes for the management of blood pressure in chronic dialysis patients.

| <b>Study</b>                      | <b>Type of Intervention</b>   | <b>Within-group effect Intervention<br/>Mean difference (m/s)<br/>(95%CI)</b> | <b>Type of comparator</b>    | <b>Within-group effect Comparator<br/>Mean difference (m/s)<br/>(95%CI)</b> |
|-----------------------------------|-------------------------------|-------------------------------------------------------------------------------|------------------------------|-----------------------------------------------------------------------------|
| Yu et al. <sup>23</sup>           | RAS inhibitor:<br>Ramipril    | -0.7 (-2.4; 0.9); p<0.05                                                      | Placebo                      | -0.40 (-2.3, 1.5); p=0.68                                                   |
| Peters et al. <sup>24</sup>       | RAS inhibitor:<br>irbesartan  | -0.8 (-1.5; 0.0); p=0.05                                                      | Placebo                      | -0.4 (-1.1; 0.4); p=0.30                                                    |
| London et al. <sup>25</sup>       | CCB: Nitrendipine             | -2.15 (-3.6; -0.71); p<0.01                                                   | Placebo                      | -0.28 (-1.6; 1.02); p=0.66                                                  |
| Saito et al. <sup>26</sup> **     | CCB: Nifedipine               | -0.19 (-0.27; -0.11);<br>p value not provided                                 | Age-matched<br>control group | +0.91 (0.84; 0.98);<br>p value not provided                                 |
| London et al. <sup>27</sup>       | RAS-inhibitor:<br>Perindopril | -2.0 (-2.5; -1.5); p<0.001                                                    | CCB: Nitrendipine            | -1.6 (-2.6; -0.72); p<0.001                                                 |
| Sun et al. <sup>28</sup>          | RAS-inhibitor:<br>Losartan    | -0.9 (-1.0; -0.8); p<0.05                                                     | Beta-Blocker:<br>Bisoprolol  | -0.4 (-0.6; -0.2); p<0.05                                                   |
| Georgianos et al. <sup>29</sup> # | RAS-inhibitor:<br>Lisinopril  | 5.5% (-4.6%; 15.6%); p=0.28                                                   | Beta-Blocker:<br>Atenolol    | -9.3% (-18.5; -0.2%); p=0.04                                                |

RAS: renin-angiotensin system; CCB: calcium channel blockers; \*\* absolute values of change in cf-PWV (expressed in m/s) was estimated from Figure 6 and Table 1 of this article using the percentages of change and their standard deviation relative to the mean baseline cf-PWV for both intervention and control groups. # the within-group effect is expressed as percentage of change (%) from baseline (95% confidence interval) calculated from table 3 in the original article.
